# Supplementary material for: On the Effect of Planetary Stable Isotope Compositions on Growth and Survival of Terrestrial Organisms
Source: PubMed Central journal article supplement (PMC5215764; doi:10.1371/journal.pone.0169296), 2017-01-04
Supplement: pone.0169296.s001.pdf [file pone.0169296.s001.pdf]

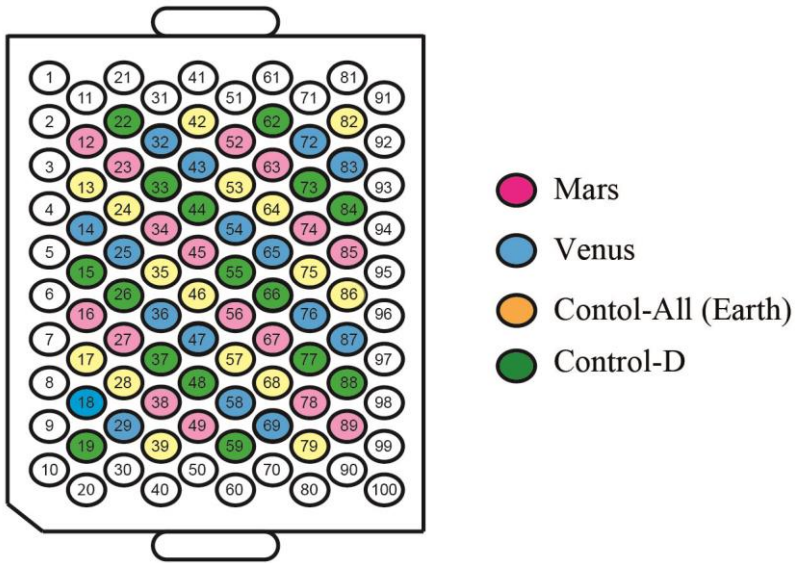

S1 Fig. Sample configuration on the 100-well honeycomb plate.
