# Supplementary material for: On the Effect of Planetary Stable Isotope Compositions on Growth and Survival of Terrestrial Organisms
Source: PubMed Central journal article supplement (PMC5215764; doi:10.1371/journal.pone.0169296), 2017-01-04
Supplement: pone.0169296.s002.pdf [file pone.0169296.s002.pdf]

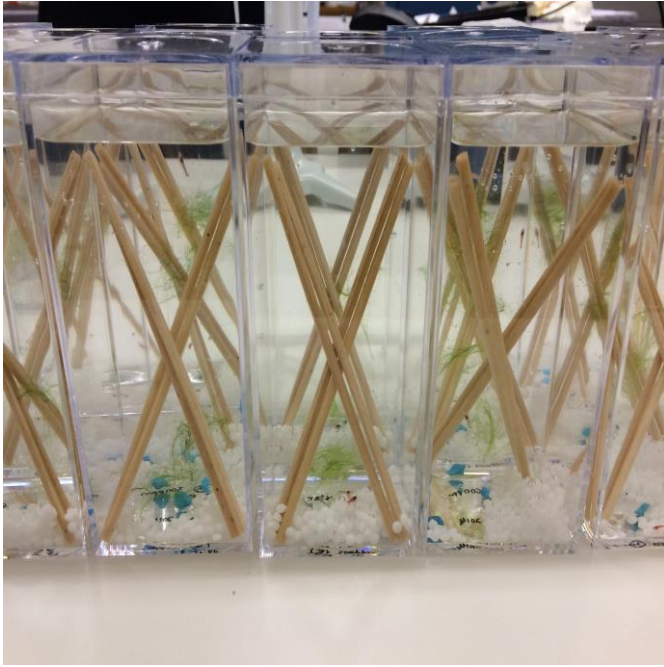

S2 Fig. The assembled BYOES 300.
