# Supplementary material for: On the Effect of Planetary Stable Isotope Compositions on Growth and Survival of Terrestrial Organisms
Source: PubMed Central journal article supplement (PMC5215764; doi:10.1371/journal.pone.0169296), 2017-01-04
Supplement: pone.0169296.s003.pdf [file pone.0169296.s003.pdf]

## Supplementary Materials

for

### **On the Effect of Planetary Stable Isotope Compositions on Growth and Survival of Terrestrial Organisms**

*Xueshu Xie and Roman A. Zubarev\**

Division of Physiological Chemistry I, Department of Medical Biochemistry and Biophysics, Karolinska Institutet, SE-17 177 Stockholm, Sweden

\*Corresponding author: Roman.Zubarev@ki.se phone/fax +46 8 524 87 594

**S1 Table. Composition of the four stock solutions.**

| <b>Stock solution</b> | <b>M9 media, <math>\mu\text{L}</math></b> | <b>Heavy water<br/>(99.16% D), <math>\mu\text{L}</math></b> | <b>Milli-Q water, <math>\mu\text{L}</math></b> |
|-----------------------|-------------------------------------------|-------------------------------------------------------------|------------------------------------------------|
| Mars                  | 4831.7 (2.55% $^{15}\text{N}$<br>media)   | 975.3                                                       | 40                                             |
| Venus                 | 4831.7 (normal)                           | 1015.3                                                      | 0                                              |
| Control-All (Earth)   | 4831.7 (normal)                           | 0                                                           | 1015.3                                         |
| Control-D             | 4831.7 (normal)                           | 40                                                          | 975.3                                          |
