# Supplementary material for: On the Effect of Planetary Stable Isotope Compositions on Growth and Survival of Terrestrial Organisms
Source: PubMed Central journal article supplement (PMC5215764; doi:10.1371/journal.pone.0169296), 2017-01-04
Supplement: pone.0169296.s004.pdf [file pone.0169296.s004.pdf]

**S2 Table. The composition of the stock solution and the corresponding D content in the BYOES 300 container.**

| <b>D composition in stock solution (%)</b> | <b>Total volume, <math>\mu\text{L}</math></b> | <b>25 ppm water, <math>\mu\text{L}</math></b> | <b>Heavy water, 99.9% D, <math>\mu\text{L}</math></b> | <b>D content in the BYOES container, ppm</b> |
|--------------------------------------------|-----------------------------------------------|-----------------------------------------------|-------------------------------------------------------|----------------------------------------------|
| 0.003                                      | 380,000                                       | 379981.0                                      | 19.0 (10% D)                                          | 120                                          |
| 0.015                                      | 380,000                                       | 379952.5                                      | 47.5                                                  | 150                                          |
| 0.075                                      | 380,000                                       | 379724.2                                      | 275.8                                                 | 300                                          |
| 0.195                                      | 380,000                                       | 379267.7                                      | 732.3                                                 | 600                                          |
| 0.435                                      | 380,000                                       | 378354.8                                      | 1645.2                                                | 1200                                         |
